# Cardioprotective anti-hyperglycaemic medications: a review of clinical trials

Haitham M. Ahmed<sup>1\*</sup>, Haitham Khraishah<sup>2</sup>, and Leslie Cho<sup>1</sup>

<sup>1</sup>Department of Cardiovascular Medicine, Heart and Vascular Institute, Cleveland Clinic, 9500 Euclid Ave, Desk JB1 Cleveland, OH 44195, USA; and <sup>2</sup>Beth Israel Deaconess Medical Center, 330 Brookline Ave Boston, MA 02215, USA

Received 6 July 2017; revised 29 August 2017; editorial decision 27 October 2017; accepted 20 November 2017; online publish-ahead-of-print 9 December 2017

Despite extensive clinical efforts to achieve stricter glycaemic control over the past few decades, cardiovascular (CV) disease remains the leading cause of death among diabetic patients. Recently, sodium-glucose cotransporter-2 (SGLT-2) inhibitors and glucagon-like peptide-1 receptor (GLP-1-R) agonists have gained attention due to their apparent effects in reducing CV mortality. Four CV randomized controlled trials: EMPA-REG, CANVAS, LEADER, and SUSTAIN-6, found a decrease in CV events among patients with type 2 diabetes on empagliflozin, canagliflozin, liraglutide, and semaglutide, respectively. In light of this data, the US Food and Drug Administration has recently approved empagliflozin for CV mortality reduction in type 2 diabetic patients, making it the first diabetes medication approved for such an indication. The purpose of this review is to summarize the results of novel anti-hyperglycaemic medication trials, and shed light on their mode of action and cardioprotective pathways.

## Keywords

Diabetes mellitus • Diabetes complications • Hypoglycaemic agents • Cardiac death • Sodium-glucose transport proteins • Glucagon-like peptide-1 receptor

## Introduction

By the year 2035, more than 600 million adults are expected to have diabetes.<sup>1</sup> Among these patients, cardiovascular (CV) events are estimated to be the leading cause of death.<sup>2</sup> Although several trials have established an association between tight glycaemic control and reduced microvascular complications,<sup>3,4</sup> the association with CV events was less clear in the Action to Control Cardiovascular Risk in Diabetes (ACCORD), Action in Diabetes and Vascular Disease: Preterax and Diamicon MR Controlled Evaluation (ADVANCE), and Veterans Affairs Diabetes (VADT) trials.<sup>5–8</sup>

Since the discovery of insulin almost a century ago, multiple generations of antihyperglycaemic medications have been introduced to the market over the years including metformin, sulfonylureas, and thiazolidinediones. While all of these agents have moderate effects on blood glucose, none have been shown to substantially and consistently lower CV events in clinical trials. Small trials comparing metformin to glipizide have shown a relative reduction in CV events,<sup>9</sup> but recent larger meta-analyses have shown overall data to be insufficient or of low strength.<sup>10</sup>

Sodium-glucose cotransporter-2 (SGLT-2) inhibitors and glucagon-like peptide-1 receptor (GLP-1-R) agonists are two

different classes of anti-hyperglycaemic agents that have recently drawn interest due to the results of four randomized controlled trials (RCTs): EMPA-REG,<sup>11</sup> CANVAS,<sup>12</sup> LEADER,<sup>13</sup> and SUSTAIN-6<sup>14</sup> that have demonstrated an apparent CV benefit of empagliflozin, canagliflozin, liraglutide, and semaglutide, respectively, in patients with type 2 diabetes. While both EMPA-REG and LEADER trials showed a decrease in CV mortality among patients with type 2 diabetes, SGLT-2 inhibitors were additionally shown to significantly reduce heart failure hospitalizations in EMPA-REG and CANVAS which may provide insights into the mechanistic pathways of this drug.<sup>11,12</sup> In this article, we review the data regarding benefits with SGLT-2 inhibitors and GLP-1-R agonists and discuss the possible mechanistic pathways by which CV event reduction may occur.

## The importance of cardiovascular safety trials in diabetes

In 2008, the US Food and Drug Administration (FDA) issued a Guidance for Industry requiring all new anti-hyperglycaemic therapies that treat type 2 diabetes to undergo pre-approval trials to rule out unacceptable CV risk using a composite endpoint of major adverse

\* Corresponding author. Tel: +1 216 445 2332, Fax: +1 216 444 8856, Email: ahmedh3@ccf.org

Published on behalf of the European Society of Cardiology. All rights reserved. © The Author 2017. For permissions, please email: journals.permissions@oup.com.

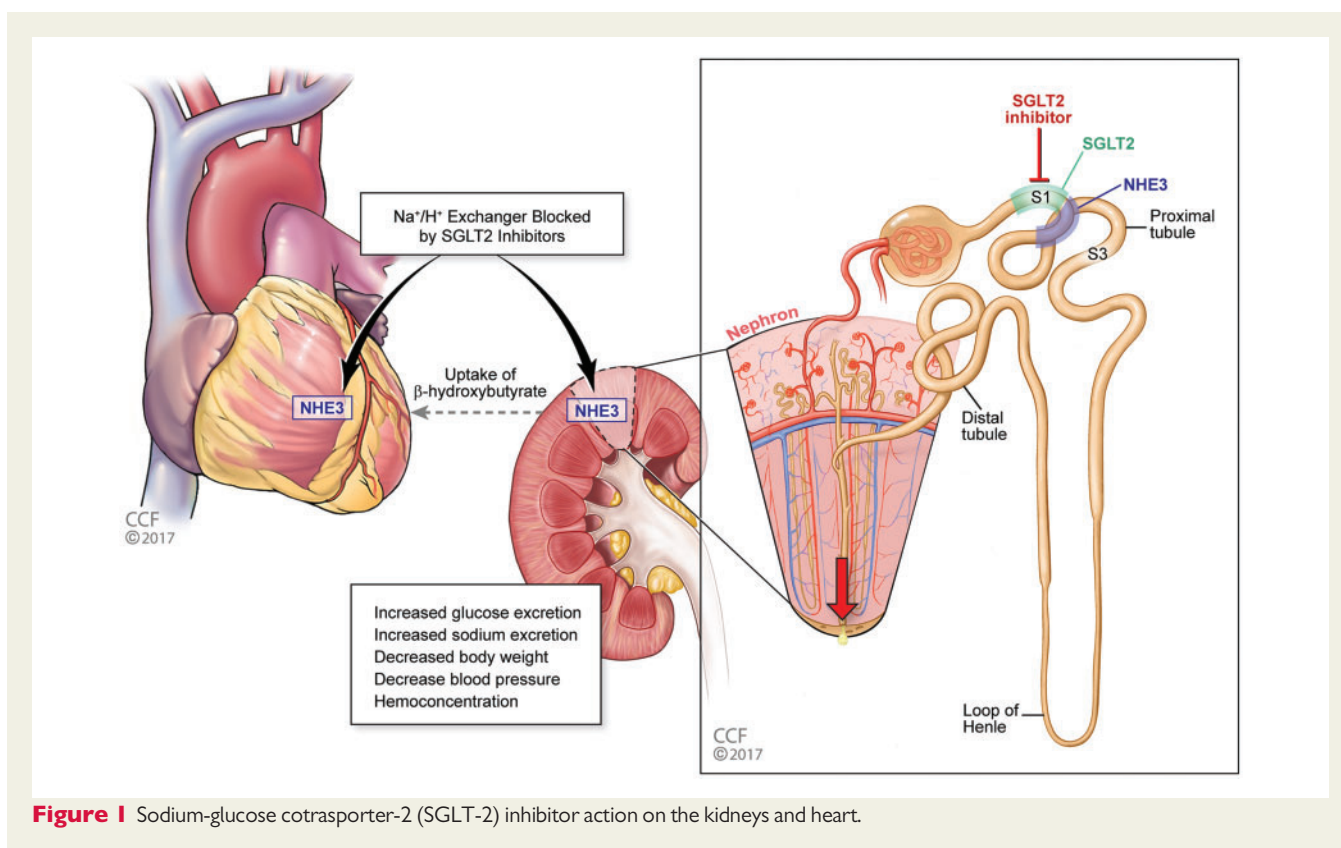

**Figure 1** Sodium-glucose cotransporter-2 (SGLT-2) inhibitor action on the kidneys and heart.

cardiovascular events (MACE). Furthermore, post-approval trials for the same composite MACE endpoints were required for continued marketing of anti-hyperglycaemic drugs.<sup>15</sup> These recommendations came as a consequence of multiple reports highlighting the increased risk of CV events among patients using rosiglitazone, a thiazolidinedione.<sup>15,16</sup> This observation came in line with already existing evidence of increased mortality with intense glycaemic control in the ACCORD trial,<sup>8</sup> and initial reports during the development of the peroxisome proliferator-activated receptor agonist, muraglitazar.<sup>17</sup> Accordingly, following the development of SGLT-2 inhibitors and GLP-1-R agonists, CV outcomes trials were also launched to evaluate the CV safety of these novel agents.

## Sodium-glucose co-transporter-2 inhibitors

Sodium-glucose cotransporter-2 inhibitors are a novel class of oral anti-hyperglycaemic medications that work by increasing urinary excretion of glucose in the renal tubules (Figure 1).<sup>18</sup> The SGLT-2 receptors are predominantly found in the first segment (S1) of the kidney's proximal tubules, in contrast to SGLT-1, which is found in the small intestine brush boarder cells and to a lesser extent in the heart, and S2 and S3 of the kidney's proximal tubules.<sup>19,20</sup> Glucose reabsorption from the proximal tubules into the blood stream is dependent upon two sequential processes. First, SGLT actively transports glucose across the apical membrane of the epithelial cells against its concentration gradient (secondary active transport) using

the energy produced by the electrochemical potential gradient of sodium ions generated by the sodium-potassium pump (primary active transport). The second step involves transporting glucose into the blood across the basolateral membrane of the proximal tubule epithelial cells by a downhill concentration gradient through facilitated diffusion using mainly GLUT-2 channels.<sup>21</sup>

Sodium-glucose cotransporter-2 has also been recently shown to be expressed on pancreatic alpha cells.<sup>22</sup> In a study by Bonner *et al.*, mRNA and protein was detected by western blots and confocal microscopy in human alpha cells. Furthermore, blocking SGLT-2 was shown to promote glucagon secretion and hepatic gluconeogenesis which suggests possible additional effects in the pancreas and liver.

There are currently three SGLT-2 inhibitors that are approved by the FDA for the treatment of type 2 diabetes: canagliflozin, dapagliflozin, and empagliflozin, with post-approval trials available only for empagliflozin and canagliflozin (Table 1).<sup>24</sup> There is an ongoing post-marketing clinical trial that is evaluating the CV outcomes of Dapagliflozin (Table 2).

The safety profile for these agents has been verified by several trials where it was demonstrated that these drugs, as mono- or in-combination therapy, have improved glycaemic control without an increase in risk of hypoglycaemia<sup>29,30</sup>; this is due to the fact that these drugs do not increase insulin secretion. Additionally, they were found to reduce blood pressure (BP), body weight, triglyceride levels ( $-2.77 \pm 9.2$  mg/dL), and increase HDL ( $1.08 \pm 1.9$  mg/dL). Adverse effects of SGLT-2 inhibitors include an increase in low-density lipoprotein (LDL) ( $1.09 \pm 2.3$  mg/dL) and total cholesterol ( $2.14 \pm 3.7$  mg/dL), an increase in the incidence of superficial mycotic genital infections without an

**Table 1** Randomized controlled trials of cardiovascular disease outcomes in diabetic patients treated with glucagon-like peptide-1 receptor agonists or sodium-glucose cotransporter-2 inhibitors

| Drug                                   | SGLT-2 inhibitors                                                         |                                                        | GLP-1 receptor agonists                                                            |                                                                             |
|----------------------------------------|---------------------------------------------------------------------------|--------------------------------------------------------|------------------------------------------------------------------------------------|-----------------------------------------------------------------------------|
|                                        | Empagliflozin <sup>11</sup>                                               | Canagliflozin <sup>12</sup>                            | Liraglutide <sup>13</sup>                                                          | Semaglutide <sup>14</sup>                                                   |
| Study                                  | EMPA-REG (2015)                                                           | CANVAS (2017)                                          | LEADER (2016)                                                                      | Sustain-6 (2016)                                                            |
| Size                                   | 7028                                                                      | 10 142                                                 | 9340                                                                               | 3297                                                                        |
| Median follow-up (years)               | 3.1                                                                       | 2.4                                                    | 2.8                                                                                | 2.1                                                                         |
| Mean age (years)                       | 63.1                                                                      | 63.3                                                   | 64.3                                                                               | 60.2                                                                        |
| Baseline HbA1C (%)                     | 8.1                                                                       | 8.2                                                    | 8.7                                                                                | 7.7                                                                         |
| ↓ HbA1C% (%)                           | 0.49–0.58                                                                 | 0.56–0.61                                              | 0.34–0.45                                                                          | 0.22–0.31                                                                   |
| Primary cardiac end-point <sup>a</sup> | Significant decrease (↓14%)                                               | Significant decrease (↓14%)                            | Significant decrease (↓14%)                                                        | No significant decrease <sup>b</sup>                                        |
| Relevant 2 end-points                  | ↓35% heart failure hospitalizations                                       | ↓Heart failure hospitalizations (↓33%)                 | ↓22% cardiovascular death                                                          | No reduction in heart failure hospitalizations                              |
| Dose                                   | 10–25 mg qd                                                               | 100–300 mg qd                                          | Up to 8% decrease in body weight<br>0.6, 1.2, 1.8 mg/dose (subcutaneous injection) | No reduction in cardiovascular deaths<br>10–20 mcg (subcutaneous injection) |
| Side effects                           | Genital infections, hypotension, diabetic ketoacidosis (rare), amputation | Genital infections, hypotension, diabetic ketoacidosis | Gastrointestinal disturbances (nausea, vomiting, diarrhoea); pancreatitis          |                                                                             |
| Contraindication                       | Severe renal dysfunction (eGFR ≤ 30 mL/min)                               |                                                        | Hx of medullary thyroid CA                                                         | Hypersensitivity reaction                                                   |

CANVAS, CANagliflozin CardioVascular Assessment; CV, cardiovascular; DECLARE-TIMI 58, Dapagliflozin Effect on Cardiovascular Events; EMPA-REG, Empagliflozin, Cardiovascular Outcomes, and Mortality in Type 2 Diabetes; ELIXA, Evaluation of Lixisenatide in Acute Coronary Syndrome; LEADER, Liraglutide Effect and Action in Diabetes: Evaluation of Cardiovascular Outcome Results; MI, myocardial infarction; SUSTAIN-6, Trial to Evaluate Cardiovascular and Other Long-term Outcomes with Semaglutide in Subjects with Type 2 Diabetes.

<sup>a</sup>A composite of death from cardiovascular causes, non-fatal myocardial infarction, or non-fatal stroke.

<sup>b</sup>A composite of death from cardiovascular causes, non-fatal myocardial infarction, non-fatal stroke, or unstable angina hospitalization.

<sup>c</sup>Death from cardiovascular causes, non-fatal myocardial infarction, non-fatal stroke, revascularization (coronary or peripheral), and hospitalization for unstable angina or heart failure.

**Table 2** Ongoing randomized controlled trials of cardiovascular disease outcomes in diabetic patients treated with glucagon-like peptide-1 receptor agonists or sodium-glucose cotransporter-2 inhibitors

|                        | Exenatide <sup>25</sup>                            | Dulaglutide <sup>26</sup>                                                                                                     | Albiglutide <sup>27</sup>                                                              | Dapagliflozin <sup>28</sup>                     |
|------------------------|----------------------------------------------------|-------------------------------------------------------------------------------------------------------------------------------|----------------------------------------------------------------------------------------|-------------------------------------------------|
| Clinical trial         | EXSCEL                                             | REWIND                                                                                                                        | HARMONY                                                                                | DECLARE-TIMI 58                                 |
| Number of subjects     | 14 000                                             | 9622                                                                                                                          | 3297                                                                                   | 17 150                                          |
| Key inclusion criteria | Type 2 diabetes<br>HbA1c 6.5–10%<br>Age > 18 years | Established vascular complications if age > 50 years OR 2 CV risk factors if age > 60 years<br>HbA1c ≤ 9.5%<br>Age > 50 years | Established vascular complications if age > 40 years<br>HbA1c > 7.0%<br>Age > 40 years | High risk for cardiovascular events<br>Age > 40 |
| Primary endpoint       | CV death, non-fatal MI, non-fatal stroke           | CV death, non-fatal MI, non-fatal stroke                                                                                      | CV death, non-fatal MI, non-fatal stroke                                               | CV death, non-fatal MI, non-fatal stroke        |
| Reporting year         | 2018                                               | 2018                                                                                                                          | 2019                                                                                   | 2019                                            |

CV, cardiovascular; DECLARE-TIMI 58, Dapagliflozin Effect on Cardiovascular Events; EXSCEL, Exenatide Study of Cardiovascular Event Lowering trial; HARMONY, study to evaluate the effect of ranolazine and dronedarone when given alone and in combination in patients with paroxysmal atrial fibrillation; MI, myocardial infarction; REWIND, Researching Cardiovascular Events With a Weekly Incretin in Diabetes.

increase in upper urinary tract infections, and a possible increase in amputations at the level of the toe or metatarsal.<sup>12,29–31</sup>

Recently, the EMPA-REG OUTCOME trial evaluated the CV safety of empagliflozin.<sup>11</sup> In this trial, a total of 7020 patients with type 2 diabetes, body-mass index (BMI) < 45, and glomerular filtration rate (GFR) > 30 mL/min/1.73 m<sup>2</sup> body surface area were randomly assigned to receive either 10 or 25 mg of empagliflozin vs. placebo daily. The primary outcome was a composite of CV death, non-fatal myocardial infarction (MI), or non-fatal stroke. Results showed a significant decrease in all-cause mortality (32%), CV mortality (38%) and hospitalization from heart failure (35%) in the empagliflozin-treated groups when compared to control subjects. The absolute reduction in heart failure hospitalizations, CV mortality, and all-cause mortality, was 1.4%, 2.2%, and 2.6%, respectively over a mean duration of 3 years. There was no significant difference in the incidence of MI or stroke between the arms of the trial. Based on these results, the FDA released a statement in December 2016 approving the use of empagliflozin in type 2 diabetic patients with pre-existing cardiovascular disease (CVD) to reduce the risk of CV death.<sup>32</sup>

Further investigations from the EMPA-REG OUTCOME TRIAL showed persistent CVD risk reduction for patients with 'prevalent' chronic kidney disease (GFR between 30 and 60 mL/min/1.73 m<sup>2</sup>),<sup>33</sup> as well as patients with heart failure and at very high risk, high risk, and low-average risk for heart failure.<sup>34,35</sup> Subsequently, two studies were initiated to evaluate the effects of empagliflozin on heart failure patients, regardless of diabetes status: empagliflozin outcome trial in patients with chronic heart failure with reduced ejection fraction and preserved ejection fraction, EMPEROR-Reduced,<sup>36</sup> and EMPEROR-Preserved,<sup>37</sup> respectively. The results of the two trials are expected by 2020.

A second post-approval CV outcome trial (see Table 1) was also recently published for canagliflozin (CANVAS).<sup>12</sup> In that trial, a total of 10 142 patients with type 2 diabetes and high CV risk were randomized to canagliflozin vs. placebo and followed for a mean of 188 weeks. The primary outcome was the same composite outcome of CV death, non-fatal MI, or non-fatal stroke as in EMPA-REG.

The mean age of participants was 63 years and the mean duration of diabetes was 14 years. Results showed that canagliflozin decreased the rate of the primary outcome from 31.5 to 26.9 participants per 1000 patient-years [hazard ratio (HR) 0.86, 95% confidence interval (CI) 0.75–0.97]. There was not a statistically significant reduction in the individual components of the primary outcome or all-cause death, although the point estimates of effect suggested benefit. Similar to EMPA-REG, there was a lower risk of hospitalization for heart failure, as well as a slower progression of albuminuria and a composite of renal outcomes (HR 0.60, 95% CI 0.47–0.77) although on the basis of the pre-specified hypothesis testing sequence these cannot be viewed as significant.

Since the publication of the initial RCTs, studies of real-world practice have shown reductions in CVD events, heart failure hospitalizations, and mortality across over 150 000 diabetic patients taking SGLT-2 inhibitors in the USA and Europe.<sup>38,39</sup> As real-world prescriptions continue to rise, data will further inform clinical practice in diabetes and CVD preventive care.

## Glucagon-like peptide-1 receptor agonists

Glucagon-like peptide-1 receptor agonists and dipeptidylpeptidase-4 (DPP-4) inhibitors are two classes of anti-hyperglycaemic medications that were developed based on the incretin pathway (Figure 2). Glucagon-like peptide-1 is secreted by a form of enteroendocrine cells that are mainly found in the ileum and colon, called L-cells, in response to food ingestion indicating that this action is independent of food interaction with L-cells and is controlled by neuronal and other poorly understood mechanisms.<sup>40–42</sup>

The GLP-1-R is expressed in a wide range of organs including the pancreas, stomach, intestines, heart, lung, kidney, skin, and central nervous system.<sup>40</sup> Upon the release of GLP-1 from the enteroendocrine cells, it is rapidly inactivated by DPP-4, a ubiquitous protease, giving it a half-life of only 1–2 min. Glucagon-like peptide-1 increases

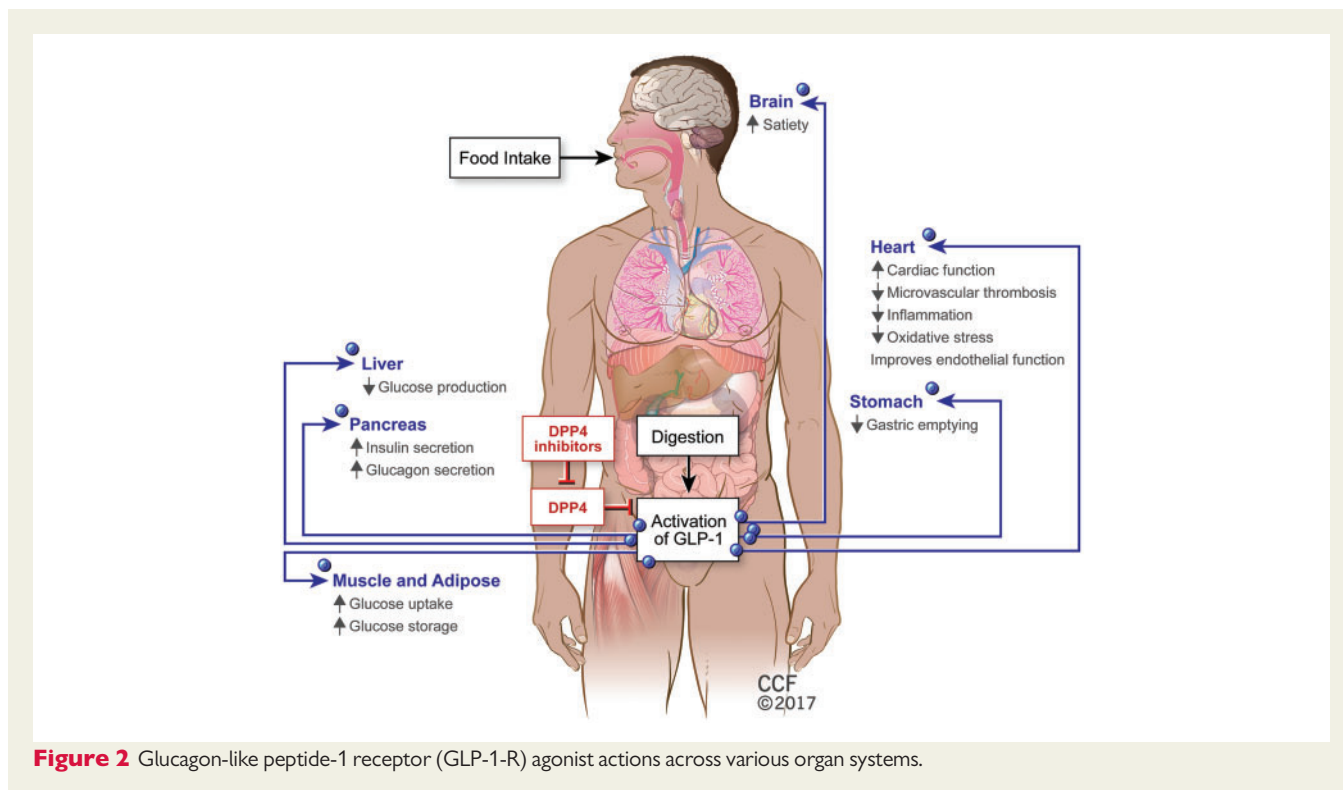

**Figure 2** Glucagon-like peptide-1 receptor (GLP-1-R) agonist actions across various organ systems.

insulin secretion by pancreatic  $\beta$  cells and inhibits glucagon secretion by  $\alpha$  cells. It has to be noted that GLP-1-insulin-secretory effect is glucose dependent i.e. GLP-1 has no effect on insulin secretion when glucose levels are approximately  $\leq 81$  mg/dL.<sup>40</sup>

Currently, there are six FDA-approved GLP-1-R agonists for the treatment of type 2 diabetes. Three of these agents are short-acting (half-life < 24 h): exenatide, liraglutide, and lixisenatide; and three are long-acting (half-life > 24 h/weekly injections): long-acting exenatide, dulaglutide, and albiglutide. Additionally, there is semaglutide, a long-acting GLP-1-R agonist that has not been approved yet by the FDA for the treatment of type 2 diabetes. In addition to their benefits in reducing HbA1c, GLP-1-R agonists have additional favourable metabolic effects in reducing body weight, LDL, hypoglycaemia events, and BP.<sup>43</sup>

Major side effects of GLP-1 agonists include gastrointestinal disturbances and injection site pruritus.<sup>44</sup> Glucagon-like peptide-1 receptor agonists should be avoided in patients with a history of medullary thyroid carcinoma or family history of multiple endocrine neoplasia 2A and 2B as animal studies have shown that liraglutide can cause thyroid C-cell hyperplasia<sup>45</sup>; however, this finding was not noted in human clinical trials or follow-up studies.<sup>46</sup> Moreover, GLP-1-R agonists are not recommended in patients with a history of pancreatitis based on post-marketing surveillance after the approval of exenatide, and hence, the FDA issued a cautionary letter in 2008.<sup>47</sup> However, several retrospective studies and a meta-analysis of 41-trials with a total of 14 972 subjects did not find an association between GLP-1-R agonist use and pancreatitis.<sup>48,49</sup>

There are currently three available CV outcome trials for GLP-1-R agonists (see Table 1): Evaluation of Lixisenatide in Acute Coronary Syndrome (ELIXA)<sup>23</sup> and Liraglutide Effect and Action in Diabetes:

Evaluation of Cardiovascular Outcome Results (LEADER)<sup>13</sup>; and one pre-marketing safety trial: Trial to Evaluate Cardiovascular and Other Long-term Outcomes with Semaglutide in Subjects with Type 2 Diabetes.<sup>14</sup> There are three additional ongoing trials that are investigating the CV outcomes of exenatide, dulaglutide, and albiglutide (Table 2).

The ELIXA trial evaluated the CV outcomes of lixisenatide in type 2 diabetic patients.<sup>23</sup> ELIXA included patients >30 with type 2 diabetes and who had had an acute coronary syndrome within 180 days of screening. A total of 6068 patients with a mean age of 60 years and an estimated GFR > 30 mL/min/1.73 m<sup>2</sup> body surface area were randomly assigned to either 10  $\mu$ g of subcutaneous lixisenatide per day or volume-matched placebo. The patients were followed for a median of 25 months. The primary outcome of the study was a composite of CV death, non-fatal MI, or non-fatal stroke. The trial did not reveal any CV benefit of lixisenatide over the standard treatment including heart failure hospitalizations.

The LEADER trial assessed the CV outcomes of liraglutide among type 2 diabetics with high CV risk by randomizing them to receive either 1.8 mg (or maximum tolerated dose) of liraglutide or placebo.<sup>13</sup> The trial followed 9340 subjects with a mean age of 64 years for a median of 3.8 years. The primary outcome was a composite of CV death, non-fatal MI, or non-fatal stroke. Results demonstrated a reduction in the primary composite outcome in patients on liraglutide when compared to standard therapy (HR 0.87; 95% CI 0.78–0.97;  $P < 0.01$  for superiority). Also, death from CV causes (HR 0.78; 95% CI 0.66–0.93;  $P = 0.007$ ) and any cause (HR 0.85; 95% CI 0.74–0.97;  $P = 0.02$ ) was less likely to occur in the liraglutide group. Although not statistically significant, the rates of non-fatal MI, non-fatal stroke, and heart failure hospitalizations were lower in the liraglutide group.

Although not yet approved for clinical use in patients with type 2 diabetes, semaglutide appears to be safe in terms of its CV profile.<sup>14</sup> SUSTAIN-6 evaluated the CV outcomes of semaglutide by randomizing diabetic patients with pre-existing CV risks to receive either 0.5 mg or 1.0 mg of subcutaneous semaglutide weekly or standard therapy. SUSTAIN-6 included 2735 patients and followed them for a median of 2.1 years.<sup>14</sup> The primary outcome was a composite of CV death, non-fatal MI, or non-fatal stroke. The trial revealed a reduction in the primary outcome in the semaglutide treated-patients when compared to placebo (HR 0.74; 95% CI 0.58–0.95;  $P < 0.02$  for superiority). This observation was driven mainly by a significant reduction in non-fatal stroke (HR 0.61; 95% CI 0.38–0.99;  $P = 0.04$ ). However, there was no significant decrease in cardiovascular deaths between both arms of the trial.

## Trial comparisons

The groundbreaking results of the EMPA-REG, CANVAS, LEADER, and SUSTAIN-6 trials will likely change the way that clinicians treat type 2 diabetes moving forward. However, several points are important to note. First, the EMPA-REG and CANVAS trials showed significant reduction in composite cardiovascular events as well as heart failure hospitalizations, while the LEADER trial showed only a reduction in cardiovascular mortality without a significant change in heart failure hospitalizations. The difference in impact of both drugs on heart failure hospitalizations, MI, and stroke risk may reflect the differences in mechanistic pathways of these therapies.

Second, before constructing an assumption about the SUSTAIN-6 trial, the following points should be taken into consideration: semaglutide has not yet been approved for clinical use, and the SUSTAIN-6 trial is mainly a safety trial that was powered to prove non-inferiority with a relatively small sample size and short follow-up, compared to post-marketing trials with larger sample sizes and follow-up, so we have to wait for post-marketing trials to make definitive conclusions.

Third, class-specific generalizations cannot be made on anti-hyperglycaemic drugs of the same category. The ELIXA trial showed a neutral effect of lixisenatide in terms of cardiovascular benefit, while liraglutide showed a decrease in CVD mortality. Nevertheless, it has to be noted that ELIXA trial included patients with recent acute coronary syndrome, who are somewhat younger, had broader range HbA1c levels on entry and shorter duration of diabetes than the LEADER trial, which excluded patients with acute coronary syndrome in the preceding 90 days. Additionally, the LEADER trial followed patients for a longer duration when compared to ELIXA (3.8 years vs. 2 years). However, ELIXA showed no trend in decreasing cardiovascular events during the 2 years of follow-up.

Similarly, the EMPA-REG trial showed CVD mortality reduction with empagliflozin, but a meta-analysis on pooled clinical trials<sup>30</sup> failed to show similar cardiovascular mortality with other SGLT-2 inhibitors. In CANVAS, there was a trend toward reduced risk of cardiovascular death but the difference was not statistically significant (HR 0.87, 95% CI 0.72–1.06). Hence, we have to wait for the results of the larger DECLARE-TIMI 58 trial in order to make a meaningful conclusion on the cardiovascular profile of this class of anti-hyperglycaemic drugs. Also, unlike the EMPA-REG and CANVAS

trials, DECLARE-TIMI will contain a larger cohort of primary prevention patients which is an important group to better understand.

## Sodium-glucose cotransporter-2 inhibitors: mechanistic pathways in cardiovascular disease event reduction

### Sodium-glucose cotransporter-2 inhibitors and blood pressure

Although SGLT-2 inhibitors were found to cause a significant reduction in both systolic and diastolic BP<sup>50–52</sup> primarily through their diuretic effect,<sup>53</sup> the actual absolute BP lowering effect of empagliflozin in EMPA-REG and CANVAS was minimal (approximately 4 mmHg difference in systolic BP).<sup>11,12</sup> Another recent RCT (HOPE-3) showed no difference in MACE with more significant systolic BP reduction of 6 mmHg.<sup>54</sup> Therefore, it is questionable whether this degree of BP reduction or the diuretic effect of empagliflozin alone is enough to explain the CVD reduction that was seen in EMPA-REG.

### Sodium-glucose cotransporter-2 inhibitors and metabolic profile

The key for the metabolic effects observed with SGLT-2 inhibitors can be attributed to their glucosuric mechanism of action.<sup>55</sup> Inhibiting SGLT-2 receptors in the kidneys leads to urinary excretion of glucose, resulting in better glycaemic control, negative energy balance leading to weight loss, and hence better insulin sensitivity. This negative energy balance would direct the cardiac myocytes toward using ketone bodies, a more efficient energy source.<sup>56</sup>

Recent meta-analyses show that SGLT-2 inhibitors significantly reduced haemoglobin A1C (HbA1c) levels by 0.5–0.7% over a follow-up period between 52 and 89 weeks.<sup>30,57</sup> In addition to lowering HbA1C, SGLT-2 inhibitors regulate post-prandial hyperglycaemia and improve insulin sensitivity.<sup>55,58</sup> Despite this glycaemic effect, it is unlikely that this is the mechanism alone by which the EMPA-REG trial reduced CVD mortality since several earlier trials have demonstrated that tight glycaemic control was not associated with a reduction in macrovascular complications.<sup>59</sup>

Sodium-glucose cotransporter-2 inhibitors have also been found to decrease body weight by 2–3 kg independent of its diuretic action.<sup>11,12,29,30,60</sup> This is because of the aforementioned negative glucose balance, shifting body energy metabolism to fat oxidation and lipolysis while decreasing glucose oxidation and utilization.<sup>61</sup>

High uric acid levels have also been linked to CVD events along with hypertension, diabetes and other metabolic diseases.<sup>62</sup> A reduction in uric acid levels among diabetic patients on SGLT-2 inhibitors has been observed in several trials,<sup>63,64</sup> however, the exact mechanism of action by which this occurred is not yet fully understood.

### Sodium-glucose cotransporter-2 inhibitors and chronic kidney disease

Diabetes mellitus is the leading cause of end-stage renal disease worldwide with approximately 20% of diabetic patients eventually developing chronic diabetic nephropathy.<sup>65</sup> Glomerular hyperfiltration, which

may be attributed to failure to constrict the afferent arteriole, is the earliest change in a diabetic kidney; and has been linked to the increased risk of developing diabetic nephropathy.<sup>66</sup> As the GFR increases, the proximal tubule reabsorption of the hyperfiltrate increases via tubular glomerulotubular balance.<sup>65</sup> This increase in proximal tubular reabsorption leads to a decrease in the delivery of solutes to the macula densa by approximately 30%, which leads to a further increase in GFR via tubuloglomerular feedback.<sup>65</sup> This eventually leads to hypertrophy and hyperplasia of the proximal tubules through the activation of various growth factors. In the light of the aforementioned tubular hypothesis of diabetic nephropathy, SGLT-2 inhibitors tend to break this vicious cycle through increasing the solute delivery to the macula densa, and hence, decreasing GFR. Moreover, SGLT-2 inhibitors tend to decrease transport work across the proximal tubules, thus decreasing kidney oxygen requirements.<sup>55</sup> Additionally, SGLT-2 inhibitors may protect the kidneys through their effects on lowering BP and controlling hyperglycaemia.<sup>29–31,50</sup>

The renal-protective effect of SGLT-2 inhibitors has been confirmed by several studies. Empagliflozin has been shown to reduce GFR in type 1<sup>67</sup> and type 2<sup>68</sup> diabetic patients. Moreover, the EMPA-REG trial showed in *post hoc* analysis that empagliflozin reduced the worsening of chronic kidney disease (CKD), defined as progression to macroalbuminaemia, doubling of plasma creatinine, initiation of renal replacement therapy or death from renal causes, when compared to standard care.<sup>11</sup> Heerspink et al.<sup>69</sup> have demonstrated that canagliflozin reduced GFR decline and albumin: creatinine ratio in diabetic patients, independent of SGLT-2 glycaemic effects. In CANVAS, canagliflozin reduced the progression of albuminuria by 27%, and the composite outcome of a sustained reduction in GFR, need for renal replacement therapy, or death from renal causes by 40%.<sup>12</sup>

## Novel pathways

A recent preliminary small study on human subjects found that adding a daily dose of 10 mg of empagliflozin to standard therapy in type 2 diabetic patients with established CV disease decreased left ventricular mass and improved diastolic function.<sup>70</sup> Another emerging pathway is the interaction between SGLT-2 receptors and the Na<sup>+</sup>-H<sup>+</sup> exchanger (NHE). It has been shown that SGLT-2 and NHE3 co-localize and interact with each other in the kidney's proximal tubules, and that the inhibition of SGLT-2 leads to a subsequent inhibition of NH<sub>3</sub>.<sup>71</sup> Renal NH<sub>3</sub> activity has been shown to be increased in heart failure rat models, and it may be responsible, at least in part, for diuretic resistance seen in heart failure patients.<sup>72</sup> Inhibition of NH<sub>3</sub> increases proton absorption and might be responsible for euglycaemic diabetic ketoacidosis seen in patients on SGLT-2 inhibitors.<sup>73</sup> Upregulation of cardiac NHE has been implicated in the pathophysiology of heart failure in rat models.<sup>74</sup> Although SGLT-2 receptors are not present in cardiac tissues, empagliflozin was shown to directly inhibit NHE in rabbit myocytes, hence increasing mitochondrial calcium concentration and decreasing intracytoplasmic calcium concentration and protecting myocytes against calcium toxicity that is implicated in heart failure.<sup>75</sup>

In light of the profound reduction in heart failure hospitalizations with empagliflozin in EMPA-REG, Ferrannini and DeFronzo<sup>76</sup> have hypothesized another novel pathway. They posit that under persistent conditions of mild ketosis, as may be the case with SGLT-2 inhibition, β-hydroxybutyrate may be taken up by the heart and oxidized

in preference to fatty acids. This improves oxygen consumption at the mitochondrial level, which along with haemoconcentration may synergistically enhance oxygen release to the tissues. Further investigation is needed to determine whether metabolic substrate shift plays a role in the cardioprotective pathways of these drugs.

Inflammation is another possible pathway since it is considered to be an independent risk factor for coronary heart disease,<sup>77</sup> and since many inflammatory diseases (e.g. rheumatoid arthritis, psoriasis, and lupus) are associated with increased cardiovascular event rates.<sup>78</sup> Anti-inflammatory effects may not be shared by classical antidiabetic drugs such as metformin, and thereby may explain the beneficial profile of SGLT-2 inhibitors in CVD event reduction.

Indeed, substantial anti-inflammatory, antioxidant, and vasculoprotective actions of empagliflozin were shown in a type 1 diabetic rat model.<sup>79</sup> Potential pleiotropic effects in cultured endothelial cells and epigenetic effects of empagliflozin treatment of ZDF rats were also recently reported.<sup>80</sup> Similarly, use of the SGLT-2 inhibitor, ipragliflozin, was shown to reduce inflammatory markers, namely interleukin 6, tumour necrosis factor-α, C-reactive protein, and monocyte chemoattractant protein-1, in streptozotocin-nicotinamide-induced type 2 diabetic mice.<sup>81</sup>

Decreased oxidative stress and inflammatory mediators following a cardiovascular event can improve cardiac functional recovery and decrease mortality; however, no human studies to-date have looked at the anti-oxidative properties of SGLT-2 inhibitors.<sup>81</sup> Kusaka et al.<sup>82</sup> found that empagliflozin improved cardiac remodelling, independent of its effect on BP, and ameliorated cardiac oxidative stress; however, the exact mechanism by which this effect occurred is not yet fully understood. We have to await the ongoing EmDia trial<sup>83</sup> which also contains a sub-study on oxidative stress parameters, and a second study<sup>84</sup> which will focus on modulation of oxidative DNA damage by empagliflozin in type 2 diabetic patients for further insight. Further research is needed to better elucidate the mechanistic pathways by which SGLT-2 inhibitors may protect the heart.

## Glucagon-like peptide-1 receptor agonists: mechanistic pathways in cardiovascular disease event reduction

### Glucagon-like peptide-1 receptor agonists and blood pressure

Earlier RCTs conducted on DPP-4 inhibitors did not find a significant reduction in CVD events when compared to standard therapy as per the SAVOR-TIMI 53,<sup>85</sup> EXAMINE,<sup>86</sup> and TECOS<sup>87</sup> trials. This suggests that liraglutide may possess some novel characteristics that work independently of endogenous incretin pathways. Although the SUSTAIN-6 trial showed a significant reduction in the incidence of stroke, and a non-significant decrease in the incidence of MI; the literature is lacking explorative studies for this effect, as semaglutide has not been approved yet for clinical use.

As with SGLT-2 inhibitors, GLP-1-R agonists cause reduction in systolic BP<sup>88</sup> independent of weight loss. However, this reduction in BP is not enough to explain the CVD event reduction observed in

the LEADER trial as liraglutide led to minimal reduction in systolic BP (1.2 mmHg).<sup>13</sup> The mechanism underlying BP reduction is not well understood and may involve natriuresis, vasodilation through vascular smooth muscle GLP-1-R, and/or other neurohormonal pathways.<sup>88</sup> Moreover, chronic GLP-1-R activation leads to an increase in heart rate through poorly defined mechanisms.<sup>13,23,88</sup>

The different outcomes of gliptin trials as compared to the LEADER trial are indeed puzzling. Dipeptidylpeptidase-4 inhibitors have been observed to affect more adverse pathways than GLP-1-R analogues, possibly because DPP-4 has many other substrates besides GLP-1. DPP4 has been shown to interact with a number of ligands including adenine deaminase, kidney NHE3, caveolin-1, thromboxane A2 receptor, fibronectin, and CXCR4, to name a few.<sup>89,90</sup> Binding to these ligands may play a role in immune regulation and T-cell activation.<sup>90</sup>

Several animal studies have shown that DPP-4 inhibitors (e.g. linagliptin) have some preserved beneficial effects in GLP-1-R knockout mice, whereas liraglutide is devoid of protective effect.<sup>91,92</sup> DPP-4 inhibitors also have different vasodilator potency in isolated vessel segments. Therefore, the question is whether all gliptins should have been investigated by outcome trials with the assumption, as was seen for empagliflozin vs. canagliflozin and liraglutide vs. lixisenatide, that not all gliptins are the same.

## Glucagon-like peptide-1 receptor agonists and metabolic profile

High-dose liraglutide (up to 3.0 mg) is the only GLP-1-R agonist that has been approved by the FDA for weight reduction purposes in overweight subjects with or without diabetes. This endorsement came as a result of the SCALE trial that demonstrated a significant reduction in body weight among the liraglutide group (4.0 kg independent of lifestyle modifications).<sup>93</sup> Moreover, liraglutide was found to cause significant reductions in total blood cholesterol, LDL, and HDL.<sup>94</sup> It was also shown that liraglutide improves glycaemic parameters such as HbA1C, and fasting blood glucose, and reduces hypoglycaemic events.<sup>13,95</sup>

## Novel pathways

Glucagon-like peptide-1 receptor agonists were found to exhibit anti-inflammatory and anti-oxidant properties in multiple studies including in the settings of hypoglycaemia,<sup>96</sup> psoriasis, obesity, diabetes,<sup>97</sup> non-alcoholic steatohepatitis,<sup>98</sup> end-stage renal disease,<sup>99</sup> and sepsis.<sup>90,100</sup> Several small RCTs looked at the cardioprotective properties of GLP-1-R analogues and showed that the administration of exenatide in patients with MI treated with percutaneous intervention decreased infarct size on cardiac imaging.<sup>101,102</sup> Similarly, liraglutide therapy in patients with MI was associated with a significant decrease in troponin T levels and an improvement in left ventricular ejection fraction after infarction.<sup>103</sup> However, liraglutide did not improve mortality, time to re-hospitalization, or ejection fraction in patients with advanced heart failure when compared to standard therapy in the small ( $N = 300$  patients) Functional Impact of GLP-1 for Heart Failure Treatment (FIGHT) Trial.<sup>104</sup>

Other possible mechanistic pathways that may be involved in CVD event reduction include the effect of GLP-1-R agonists on vascular endothelium and platelet aggregation.<sup>105</sup> In endotoxemic mice,

GLP-1-R activation with linagliptin and liraglutide was shown to attenuate microvascular thrombosis, nitro-oxidative stress, and platelet activation.<sup>90,106</sup> Data from these pre-clinical studies show that these mechanisms may be cAMP/PKA dependent. Further research is needed to better understand the pathways by which these agents may reduce CVD events.

## Conclusion

Four groundbreaking RCTs have found significant CVD risk reduction in diabetic patients treated with empagliflozin, canagliflozin, liraglutide, and semaglutide. The results of these trials are unique since prior studies investigating the use of diuretics or tight glycaemic control in diabetic patients have failed to show a decrease in cardiovascular mortality. When prescribing these agents, the CVD benefit must be weighed against the risks seen in clinical trials including risks of genital infections, toe/metatarsal amputations, and gastrointestinal disturbances. The ideal patient is one that has (i) type II diabetes, (ii) a history of prior MI, coronary revascularization, stroke, cerebrovascular disease, or peripheral artery disease, and (iii) a GFR > 30 mL/min/1.73 m<sup>2</sup>. Patients without prior CVD, but with estimated 10-year risk >10% should also be considered.

To determine whether the cardiovascular benefit observed in these trials is class- or drug-specific, we have to wait for the results of cardiovascular outcome trials being currently conducted. Thus far, pre-clinical and clinical studies have shown several novel mechanisms whereby GLP-1-analogues may reduce microvascular thrombosis, inflammation, oxidative stress, and platelet activation. Sodium-glucose cotransporter-2 inhibitors additionally reduce BP, improve cardiac remodelling, and ameliorate cardiac oxidative stress. There is also emerging data that its impact on the Na<sup>+</sup>-H<sup>+</sup> exchanger may be an important pathway in heart failure. More extensive animal and human studies are needed to help further understand the mechanistic pathways by which SGLT-2 inhibitors and GLP-1-R agonists incur cardiovascular benefit.

**Conflict of interest:** none declared.

## References

1. International Diabetes Federation. IDF diabetes atlas. 2014.
2. Emerging Risk Factors Collaboration; Seshasai SR, Kaptoge S, Thompson A, Di Angelantonio E, Gao P, Sarwar N, Whincup PH, Mukamal KJ, Gillum RF, Holme I, Njolstad I, Fletcher A, Nilsson P, Lewington S, Collins R, Gudnason V, Thompson SG, Sattar N, Selvin E, Hu FB, Danesh J. Diabetes mellitus, fasting glucose, and risk of cause-specific death. *N Engl J Med* 2011;**364**:829–841.
3. The Diabetes Control and Complications Trial Research Group. The effect of intensive treatment of diabetes on the development and progression of long-term complications in insulin-dependent diabetes mellitus. The diabetes control and complications trial research group. *N Engl J Med* 1993;**329**:977–986.
4. Ohkubo Y, Kishikawa H, Araki E, Miyata T, Isami S, Motoyoshi S, Kojima Y, Furuyoshi N, Shichiri M. Intensive insulin therapy prevents the progression of diabetic microvascular complications in Japanese patients with non-insulin-dependent diabetes mellitus: a randomized prospective 6-year study. *Diabetes Res Clin Pract* 1995;**28**:103–117.
5. ADVANCE Collaborative Group; Patel A, MacMahon S, Chalmers J, Neal B, Billot L, Woodward M, Marre M, Cooper M, Glasziou P, Grobbee D, Hamet P, Harrap S, Heller S, Liu L, Mancia G, Mogensen CE, Pan C, Poulter N, Rodgers A, Williams B, Bompoint S, de Zeeuw D, Joshi R, Travert F. Intensive blood glucose control and vascular outcomes in patients with type 2 diabetes. *N Engl J Med* 2008;**358**:2560–2572.
6. Skyler JS, Bergenstal R, Bonow RO, Buse J, Deedwania P, Gale EA, Howard BV, Kirkman MS, Kosiborod M, Reaven P, Sherwin RS; American Diabetes



- Association, American College of Cardiology Foundation, American Heart Association. Intensive glycemic control and the prevention of cardiovascular events: implications of the accord, advance, and va diabetes trials: a position statement of the American Diabetes Association and a scientific statement of the American College Of Cardiology Foundation and the American Heart Association. *J Am Coll Cardiol* 2009;**53**:298–304.
7. ACCORD Study Group, Gerstein HC, Miller ME, Genuth S, Ismail-Beigi F, Buse JB, Goff DC Jr, Probstfield JL, Cushman WC, Ginsberg HN, Bigger JT, Grimm RH Jr, Byington RP, Rosenberg YD, Friedewald WT. Long-term effects of intensive glucose lowering on cardiovascular outcomes. *N Engl J Med* 2011;**364**:818–828.
  8. Gerstein HC, Riddle MC, Kendall DM, Cohen RM, Golland R, Feinglos MN, Kirk JK, Hamilton BP, Ismail-Beigi F, Feeney P, Group AS. Glycemia treatment strategies in the action to control cardiovascular risk in diabetes (ACCORD) trial. *Am J Cardiol* 2007;**99**:34i–43i.
  9. Hong J, Zhang Y, Lai S, Lv A, Su Q, Dong Y, Zhou Z, Tang W, Zhao J, Cui L, Zou D, Wang D, Li H, Liu C, Wu G, Shen J, Zhu D, Wang W, Shen W, Ning G; SPREAD-DIMCAD Investigators. Effects of metformin versus glipizide on cardiovascular outcomes in patients with type 2 diabetes and coronary artery disease. *Diabetes Care* 2013;**36**:1304–1311.
  10. Maruthur NM, Tseng E, Hutfless S, Wilson LM, Suarez-Cuervo C, Berger Z, Chu Y, Iyoha E, Segal JB, Bolen S. Diabetes medications as monotherapy or metformin-based combination therapy for type 2 diabetes: a systematic review and meta-analysis. *Ann Intern Med* 2016;**164**:740–751.
  11. Zinman B, Wanner C, Lachin JM, Fitchett D, Bluhmki E, Hantel S, Mattheus M, Devins T, Johansen OE, Woerle HJ, Broedl UC, Inzucchi SE; EMPA-REG OUTCOMES Investigators. Empagliflozin, cardiovascular outcomes, and mortality in type 2 diabetes. *N Engl J Med* 2015;**373**:2117–2128.
  12. Neal B, Perkovic V, Mahaffey KW, de Zeeuw D, Fulcher G, Erondou N, Shaw W, Law G, Desai M, Matthews DR; CANVAS Program Collaborative Group. Canagliflozin and cardiovascular and renal events in type 2 diabetes. *N Engl J Med* 2017;**377**:644–657.
  13. Marso SP, Daniels GH, Brown-Frandsen K, Kristensen P, Mann JF, Nauck MA, Nissen SE, Pocock S, Poulter NR, Ravn LS, Steinberg WM, Stockner M, Zinman B, Bergenstal RM, Buse JB, Committee LS; LEADER Trial Investigators. Liraglutide and cardiovascular outcomes in type 2 diabetes. *N Engl J Med* 2016;**375**:311–322.
  14. Marso SP, Bain SC, Consoli A, Eliaschewitz FG, Jodar E, Leiter LA, Lingvay I, Rosenstock J, Seufert J, Warren ML, Woo V, Hansen O, Holst AG, Pettersson J, Vilsboll T; SUSTAIN-6 Investigators. Semaglutide and cardiovascular outcomes in patients with type 2 diabetes. *N Engl J Med* 2016;**375**:1834–1844.
  15. UfaD Administration. Guidance for industry. Diabetes mellitus—evaluating cardiovascular risk in new antidiabetic therapies to treat type 2 diabetes. 2008
  16. Hiatt WR, Kaul S, Smith RJ. The cardiovascular safety of diabetes drugs—insights from the rosiglitazone experience. *N Engl J Med* 2013;**369**:1285–1287.
  17. Nissen SE, Wolski K, Topol EJ. Effect of muraglitazar on death and major adverse cardiovascular events in patients with type 2 diabetes mellitus. *JAMA* 2005;**294**:2581–2586.
  18. Ferrannini E, DeFronzo RA. Impact of glucose-lowering drugs on cardiovascular disease in type 2 diabetes. *Eur Heart J* 2015;**36**:2288–2296.
  19. Syed SH, Gosavi S, Shami W, Bustamante M, Farah Z, Teleb M, Abbas A, Said S, Mukherjee D. A review of sodium glucose co-transporter 2 inhibitors canagliflozin, dapagliflozin and empagliflozin. *Cardiovasc Hematol Agents Med Chem* 2015;**13**:105–112.
  20. Harada N, Inagaki N. Role of sodium-glucose transporters in glucose uptake of the intestine and kidney. *J Diabetes Investig* 2012;**3**:352–353.
  21. Wright EM, Loo DD, Hirayama BA. Biology of human sodium glucose transporters. *Physiol Rev* 2011;**91**:733–794.
  22. Bonner C, Kerr-Conte J, Gmyr V, Queniat G, Moerman E, Thévenet J, Beaucamps C, Delalleau N, Popescu I, Malaisse WJ, Sener A, Deprez B, Abderrahmani A, Staels B, Pattou F. Inhibition of the glucose transporter SGLT2 with dapagliflozin in pancreatic alpha cells triggers glucagon secretion. *Nat Med* 2015;**21**:512–517.
  23. Pfeffer MA, Claggett B, Diaz R, Dickstein K, Gerstein HC, Kober LV, Lawson FC, Ping L, Wei X, Lewis EF, Maggioni AP, McMurray JJ, Probstfield JL, Riddle MC, Solomon SD, Tardif JC; ELIXA Investigators. Lixisenatide in patients with type 2 diabetes and acute coronary syndrome. *N Engl J Med* 2015;**373**:2247–2257.
  24. Paneni F, Lüscher TF. Cardiovascular protection in the treatment of type 2 diabetes: a review of clinical trial results across drug classes. *Am J Cardiol* 2017;**120**:S17–S27.
  25. ClinicalTrials.gov. Exenatide study of cardiovascular event lowering trial (exscl): a trial to evaluate cardiovascular outcomes after treatment with exenatide once weekly in patients with type 2 diabetes mellitus. 2017. <https://clinicaltrials.gov/ct2/show/NCT01144338> (6 November 2017).
  26. ClinicalTrials.gov. Rewind: researching cardiovascular events with a weekly incretin in diabetes. 2017. <https://clinicaltrials.gov/ct2/show/NCT01394952> (6 November 2017).
  27. ClinicalTrials.gov. Harmony: effect of abiglutide, when added to standard blood glucose lowering therapies, on major cardiovascular events in subjects with type 2 diabetes mellitus. 2017. <https://clinicaltrials.gov/ct2/show/NCT02465515> (6 November 2017).
  28. ClinicalTrials.gov. Multicenter trial to evaluate the effect of dapagliflozin on the incidence of cardiovascular events (declare-tim158). 2016. <https://clinicaltrials.gov/ct2/show/NCT01730534> (6 November 2017).
  29. Halimi S, Verges B. Adverse effects and safety of SGLT-2 inhibitors. *Diabetes Metab* 2014;**40**:S28–S34.
  30. Saad M, Mahmoud AN, Elgendy IY, Abuzaid A, Barakat AF, Elgendy AY, Al-Ani M, Mentias A, Nairooz R, Bavry AA, Mukherjee D. Cardiovascular outcomes with sodium-glucose cotransporter-2 inhibitors in patients with type ii diabetes mellitus: a meta-analysis of placebo-controlled randomized trials. *Int J Cardiol* 2017;**228**:352–358.
  31. Vasilakou D, Karagiannis T, Athanasiadou E, Mainou M, Liakos A, Bekiri E, Sarigianni M, Matthews DR, Tsapas A. Sodium-glucose cotransporter 2 inhibitors for type 2 diabetes: a systematic review and meta-analysis. *Ann Intern Med* 2013;**159**:262–274.
  32. UfaD Administration. FDA approves Jardiance to reduce cardiovascular death in adults with type 2 diabetes. 2016
  33. Wanner CLJ, Inzucchi SE, Fitchett D, Mattheus M, George JT, Woerle HJ, Broedl UC, von Eynatten M, Zinman B; EMPA-REG OUTCOME<sup>®</sup> investigators. Empagliflozin and clinical outcomes in patients with type 2 diabetes, established cardiovascular disease and chronic kidney disease. *Circulation* 2017; doi: 10.1161/CIRCULATIONAHA.117.028268.
  34. Fitchett D, Zinman B, Wanner C, Lachin JM, Hantel S, Salsali A, Johansen OE, Woerle HJ, Broedl UC, Inzucchi SE; EMPA-REG OUTCOME<sup>®</sup> trial investigators. Heart failure outcomes with empagliflozin in patients with type 2 diabetes at high cardiovascular risk: results of the emp-a-reg outcome<sup>®</sup> trial. *Eur Heart J* 2016;**37**:1526–1534.
  35. Fitchett D, Butler J, Borne PVD, Zinman B, Lachin JM, Wanner C, Woerle HJ, Hantel S, George JT, Johansen OE, Inzucchi SE; EMPA-REG OUTCOME<sup>®</sup> trial investigators. Effects of empagliflozin on risk for cardiovascular death and heart failure hospitalization across the spectrum of heart failure risk in the emp-a-reg outcome<sup>®</sup> trial. *Eur Heart J* 2017; doi: 10.1093/eurheartj/ehx511.
  36. ClinicalTrials.gov. Empagliflozin outcome trial in patients with chronic heart failure with reduced ejection fraction (emperor-reduced). 2017. <https://clinicaltrials.gov/ct2/show/NCT03057977> (6 November 2017).
  37. ClinicalTrials.gov. Empagliflozin outcome trial in patients with chronic heart failure with preserved ejection fraction (emperor-preserved). 2017. <https://clinicaltrials.gov/ct2/show/NCT03057951> (6 November 2017).
  38. Kosiborod M, Cavender MA, Fu AZ, Wilding JP, Khunti K, Holl RW, Norhammar A, Birkeland KI, Jørgensen ME, Thuresson M, Arya N, Bodegård J, Hammar N, Fenici P; CVD-REAL Investigators and Study Group. Lower risk of heart failure and death in patients initiated on sodium-glucose cotransporter-2 inhibitors versus other glucose-lowering drugs: the cvd-real study (comparative effectiveness of cardiovascular outcomes in new users of sodium-glucose cotransporter-2 inhibitors). *Circulation* 2017;**136**:249–259.
  39. Birkeland KI, Jørgensen ME, Carstensen B, Persson F, Gulseth HL, Thuresson M, Fenici P, Nathanson D, Nyström T, Eriksson JW, Bodegård J, Norhammar A. Cardiovascular mortality and morbidity in patients with type 2 diabetes following initiation of sodium-glucose co-transporter-2 inhibitors versus other glucose-lowering drugs (cvd-real nordic): a multinational observational analysis. *Lancet Diabetes Endocrinol* 2017;**5**:709–717.
  40. Baggio LL, Drucker DJ. Biology of incretins: Glp-1 and gip. *Gastroenterology* 2007;**132**:2131–2157.
  41. Deacon CF, Ahren B. Physiology of incretins in health and disease. *Rev Diabet Stud* 2011;**8**:293–306.
  42. Gautier JF, Choukem SP, Girard J. Physiology of incretins (gip and glp-1) and abnormalities in type 2 diabetes. *Diabetes Metab* 2008;**34**(Suppl 2):S65–S72.
  43. Pinelli NR, Hurren KM. Efficacy and safety of long-acting glucagon-like peptide-1 receptor agonists compared with exenatide twice daily and sitagliptin in type 2 diabetes mellitus: a systematic review and meta-analysis. *Ann Pharmacother* 2011;**45**:850–860.
  44. Htike ZZ, Zaccardi F, Papamargaritis D, Webb DR, Khunti K, Davies MJ. Efficacy and safety of glucagon-like peptide-1 receptor agonists in type 2 diabetes: a systematic review and mixed-treatment comparison analysis. *Diabetes Obes Metab* 2017;**19**:524–536.
  45. Drucker DJ, Sherman SI, Bergenstal RM, Buse JB. The safety of incretin-based therapies—review of the scientific evidence. *J Clin Endocrinol Metab* 2011;**96**:2027–2031.
  46. Lunati ME, Grancini V, Colombo C, Palmieri E, Resi V, Perrino M, Orsi E, Fugazzola L. Basal and stimulated calcitonin levels in patients with type 2

- diabetes did not change during 1 year of liraglutide treatment. *Metabolism* 2016; **65**:1–6.
47. Koehler JA, Baggio LL, Lamont BJ, Ali S, Drucker DJ. Glucagon-like peptide-1 receptor activation modulates pancreatitis-associated gene expression but does not modify the susceptibility to experimental pancreatitis in mice. *Diabetes* 2009; **58**:2148–2161.
  48. Noel RA, Braun DK, Patterson RE, Bloomgren GL. Increased risk of acute pancreatitis and biliary disease observed in patients with type 2 diabetes: a retrospective cohort study. *Diabetes Care* 2009; **32**:834–838.
  49. Samson SL, Garber AJ. A plethora of glp-1 agonists: decisions about what to use and when. *Curr Diab Rep* 2016; **16**:120.
  50. Baker WL, Smyth LR, Riche DM, Bourret EM, Chamberlin KW, White WB. Effects of sodium-glucose co-transporter 2 inhibitors on blood pressure: a systematic review and meta-analysis. *J Am Soc Hypertens* 2014; **8**:262–275.e9.
  51. Weir MR, Januszewicz A, Gilbert RE, Vijapurkar U, Kline I, Fung A, Meininger G. Effect of canagliflozin on blood pressure and adverse events related to osmotic diuresis and reduced intravascular volume in patients with type 2 diabetes mellitus. *J Clin Hypertens (Greenwich)* 2014; **16**:875–882.
  52. Scheen AJ. Effects of reducing blood pressure on cardiovascular outcomes and mortality in patients with type 2 diabetes: focus on sgl2t inhibitors and empagreg outcome. *Diabetes Res Clin Pract* 2016; **121**:204–214.
  53. Lambers Heerspink HJ, de Zeeuw D, Wie L, Leslie B, List J. Dapagliflozin a glucose-regulating drug with diuretic properties in subjects with type 2 diabetes. *Diabetes Obes Metab* 2013; **15**:853–862.
  54. Lonn EM, Bosch J, Lopez-Jaramillo P, Zhu J, Liu L, Pais P, Diaz R, Xavier D, Sliwa K, Dans A, Avezum A, Piegas LS, Keltai K, Keltai M, Chazova I, Peters RJ, Held C, Yusuf K, Lewis BS, Jansky P, Parkhomenko A, Khunti K, Toff WD, Reid CM, Varigos J, Leiter LA, Molina DL, McKelvie R, Pogue J, Wilkinson J, Jung H, Dagenais G, Yusuf S, Investigators H. Blood-pressure lowering in intermediate-risk persons without cardiovascular disease. *N Engl J Med* 2016; **374**:2009–2020.
  55. Vallon V, Thomson SC. Targeting renal glucose reabsorption to treat hyperglycaemia: the pleiotropic effects of sgl2t inhibition. *Diabetologia* 2017; **60**:215–225.
  56. Verma S, McMurray JJV, Cherney DZI. The metabolodiuretic promise of sodium-dependent glucose cotransporter 2 inhibition: the search for the sweet spot in heart failure. *JAMA Cardiol* 2017; **2**:939.
  57. Monami M, Nardini C, Mannucci E. Efficacy and safety of sodium glucose cotransport-2 inhibitors in type 2 diabetes: a meta-analysis of randomized clinical trials. *Diabetes Obes Metab* 2014; **16**:457–466.
  58. Heise T, Seman L, Macha S, Jones P, Marquart A, Pinnetti S, Woerle HJ, Dugi K. Safety, tolerability, pharmacokinetics, and pharmacodynamics of multiple rising doses of empagliflozin in patients with type 2 diabetes mellitus. *Diabetes Ther* 2013; **4**:331–345.
  59. Gore MO, McGuire DK. A test in context: hemoglobin A1c and cardiovascular disease. *J Am Coll Cardiol* 2016; **68**:2479–2486.
  60. Madaan T, Akhtar M, Najmi AK. Sodium glucose cotransporter 2 (SGLT2) inhibitors: current status and future perspective. *Eur J Pharm Sci* 2016; **93**:244–252.
  61. Daniele G, Xiong J, Solis-Herrera C, Merovci A, Eldor R, Tripathy D, DeFronzo RA, Norton L, Abdul-Ghani M. Dapagliflozin enhances fat oxidation and ketone production in patients with type 2 diabetes. *Diabetes Care* 2016; **39**:2036–2041.
  62. Kanbay M, Jensen T, Solak Y, Le M, Roncal-Jimenez C, Rivard C, Lanaspas MA, Nakagawa T, Johnson RJ. Uric acid in metabolic syndrome: from an innocent bystander to a central player. *Eur J Intern Med* 2016; **29**:3–8.
  63. Bailey CJ, Gross JL, Pieters A, Bastien A, List JF. Effect of dapagliflozin in patients with type 2 diabetes who have inadequate glycaemic control with metformin: a randomised, double-blind, placebo-controlled trial. *Lancet* 2010; **375**:2223–2233.
  64. Rosenstock J, Aggarwal N, Polidori D, Zhao Y, Arbit D, Usiskin K, Capuano G, Canovatchel W, Canagliflozin DIASG. Dose-ranging effects of canagliflozin, a sodium-glucose cotransporter 2 inhibitor, as add-on to metformin in subjects with type 2 diabetes. *Diabetes Care* 2012; **35**:1232–1238.
  65. Vallon V, Thomson SC. Renal function in diabetic disease models: the tubular system in the pathophysiology of the diabetic kidney. *Annu Rev Physiol* 2012; **74**:351–375.
  66. Magee GM, Bilous RW, Cardwell CR, Hunter SJ, Kee F, Fogarty DG. Is hyperfiltration associated with the future risk of developing diabetic nephropathy? A meta-analysis. *Diabetologia* 2009; **52**:691–697.
  67. Cherney DZ, Perkins BA, Soleymanlou N, Maione M, Lai V, Lee A, Fagan NM, Woerle HJ, Johansen OE, Broedl UC, von Eynatten M. Renal hemodynamic effect of sodium-glucose cotransporter 2 inhibition in patients with type 1 diabetes mellitus. *Circulation* 2014; **129**:587–597.
  68. Barnett AH, Mithal A, Manassie J, Jones R, Rattunde H, Woerle HJ, Broedl UC; EMAP-REG RENAL Trial Investigators. Efficacy and safety of empagliflozin added to existing antidiabetes treatment in patients with type 2 diabetes and chronic kidney disease: a randomised, double-blind, placebo-controlled trial. *Lancet Diabetes Endocrinol* 2014; **2**:369–384.
  69. Heerspink HJ, Desai M, Jardine M, Balis D, Meininger G, Perkovic V. Canagliflozin slows progression of renal function decline independently of glycaemic effects. *J Am Soc Nephrol* 2017; **28**:368–375.
  70. Verma S, Garg A, Yan AT, Gupta AK, Al-Omran M, Sabongui A, Teoh H, Mazer CD, Connelly KA. Effect of empagliflozin on left ventricular mass and diastolic function in individuals with diabetes: an important clue to the empagreg outcome trial? *Diabetes Care* 2016; **39**:e212–e213.
  71. Pessoa TD, Campos LC, Carraro-Lacroix L, Girardi AC, Malnic G. Functional role of glucose metabolism, osmotic stress, and sodium-glucose cotransporter isoform-mediated transport on na+/h+ exchanger isoform 3 activity in the renal proximal tubule. *J Am Soc Nephrol* 2014; **25**:2028–2039.
  72. Inoue BH, dos Santos L, Pessoa TD, Antonio EL, Pacheco BP, Savignano FA, Carraro-Lacroix LR, Tucci PJ, Malnic G, Girardi AC. Increased nhe3 abundance and transport activity in renal proximal tubule of rats with heart failure. *Am J Physiol Regul Integr Comp Physiol* 2012; **302**:R166–R174.
  73. Packer M, Anker SD, Butler J, Filippatos G, Zannad F. Effects of sodium-glucose cotransporter 2 inhibitors for the treatment of patients with heart failure: proposal of a novel mechanism of action. *JAMA Cardiol* 2017; **2**:1025.
  74. Nakamura TY, Iwata Y, Arai Y, Komamura K, Wakabayashi S. Activation of na+/h+ exchanger 1 is sufficient to generate ca2+ signals that induce cardiac hypertrophy and heart failure. *Circ Res* 2008; **103**:891–899.
  75. Baartscheer A, Schumacher CA, Wust RC, Fiolet JW, Stienen GJ, Coronel R, Zuurbier CJ. Empagliflozin decreases myocardial cytoplasmic na+ through inhibition of the cardiac na+/h+ exchanger in rats and rabbits. *Diabetologia* 2017; **60**:568–573.
  76. Ferrannini E, Mark M, Mayoux E. Cv protection in the empagreg outcome trial: a “thrift substrate” hypothesis. *Diabetes Care* 2016; **39**:1108–1114.
  77. Kaptoge S, Seshasai S, Gao P, Freitag DF, Butterworth AS, Borglykke A, Di Angelantonio E, Gudnason V, Rumley A, Lowe GD, Jørgensen T, Danesh J. Inflammatory cytokines and risk of coronary heart disease: new prospective study and updated meta-analysis. *Eur Heart J* 2014; **35**:578–589.
  78. Karbach S, Wenzel P, Waisman A, Munzel T, Daiber A. Enos uncoupling in cardiovascular diseases—the role of oxidative stress and inflammation. *Curr Pharm Des* 2017; **20**:3579–3594.
  79. Oelze M, Kröller-Schön S, Welschof P, Jansen T, Hausding M, Mikhed Y, Stamm P, Mader M, Zinßius E, Agdauletova S, Gottschlich A, Steven S, Schulz E, Bottari SP, Mayoux E, Münzel T, Daiber A, Cignarella A. The sodium-glucose cotransporter 2 inhibitor empagliflozin improves diabetes-induced vascular dysfunction in the streptozotocin diabetes rat model by interfering with oxidative stress and glucotoxicity. *PLoS One* 2014; **9**:e112394.
  80. Steven S, Oelze M, Hanf A, Kröller-Schön S, Kashani F, Roohani S, Welschof P, Kopp M, Gödtel-Armbrust U, Xia N, Li H, Schulz E, Lackner KJ, Wojnowski L, Bottari SP, Wenzel P, Mayoux E, Münzel T, Daiber A. The SGLT2 inhibitor empagliflozin improves the primary diabetic complications in ZDF rats. *Redox Biol* 2017; **13**:370–385.
  81. Scheen AJ, Esser N, Paquot N. Antidiabetic agents: potential anti-inflammatory activity beyond glucose control. *Diabetes Metab* 2015; **41**:183–194.
  82. Kusaka H, Koibuchi N, Hasegawa Y, Ogawa H, Kim-Mitsuyama S. Empagliflozin lessened cardiac injury and reduced visceral adipocyte hypertrophy in prediabetic rats with metabolic syndrome. *Cardiovasc Diabetol* 2016; **15**:157.
  83. Brown AJM, Lang C, McCrimmon R, Struthers A. Does dapagliflozin regress left ventricular hypertrophy in patients with type 2 diabetes? A prospective, double-blind, randomised, placebo-controlled study. *BMC Cardiovasc Disord* 2017; **17**:229.
  84. Larsen EL, Cejvanovic V, Kjær LK, Vilsbøll T, Knop FK, Rungby J, Poulsen HE. The effect of empagliflozin on oxidative nucleic acid modifications in patients with type 2 diabetes: protocol for a randomised, double-blinded, placebo-controlled trial. *BMJ Open* 2017; **7**:e014728.
  85. Scirica BM, Bhatt DL, Braunwald E, Steg PG, Davidson J, Hirshberg B, Ohman P, Frederich R, Wiviott SD, Hoffman EB, Cavender MA, Udell JA, Desai NR, Mosenzon O, McGuire DK, Ray KK, Leiter LA, Raz I; SAVOR-TIMI 53 Steering Committee and Investigators. Saxagliptin and cardiovascular outcomes in patients with type 2 diabetes mellitus. *N Engl J Med* 2013; **369**:1317–1326.
  86. White WB, Cannon CP, Heller SR, Nissen SE, Bergenstal RM, Bakris GL, Perez AT, Fleck PR, Mehta CR, Kupfer S, Wilson C, Cushman WC, Zannad F; EXAMINE Investigators. Alogliptin after acute coronary syndrome in patients with type 2 diabetes. *N Engl J Med* 2013; **369**:1327–1335.
  87. Green JB, Bethel MA, Armstrong PW, Buse JB, Engel SS, Garg J, Josse R, Kaufman KD, Koglin J, Korn S, Lachin JM, McGuire DK, Pencina MJ, Standl E, Stein PP, Suryawanshi S, Van de Werf F, Peterson ED, Holman RR; TECOS Group. Effect of sitagliptin on cardiovascular outcomes in type 2 diabetes. *N Engl J Med* 2015; **373**:232–242.
  88. Ussher JR, Drucker DJ. Cardiovascular biology of the incretin system. *Endocr Rev* 2012; **33**:187–215.

89. Zhong J, Rao X, Rajagopalan S. An emerging role of dipeptidyl peptidase 4 (dpp4) beyond glucose control: potential implications in cardiovascular disease. *Atherosclerosis* 2013;**226**:305–314.
90. Steven SHM, Krölller-Schön S, Mader M, Mikhed Y, Stamm P, Zinßius E, Pfeffer A, Welschof P, Agdauletova S, Sudowe S, Li H, Oelze M, Schulz E, Klein T, Münzel T, Daiber A. Gliptin and glp-1 analog treatment improves survival and vascular inflammation/dysfunction in animals with lipopolysaccharide-induced endotoxemia. *Basic Res Cardiol* 2015;**110**:6.
91. Vellecco V, Mitidieri E, Gargiulo A, Brancaleone V, Matassa D, Klein T, Esposito F, Cirino G, Bucci M. Vascular effects of linagliptin in non-obese diabetic mice are glucose-independent and involve positive modulation of the endothelial nitric oxide synthase (eNOS)/caveolin-1 (CAV-1) pathway. *Diabetes Obes Metab* 2016;**18**:1236–1243.
92. Darsalia V, Larsson M, Lietzau G, Nathanson D, Nyström T, Klein T, Patrone C. Gliptin-mediated neuroprotection against stroke requires chronic pretreatment and is independent of glucagon-like peptide-1 receptor. *Diabetes Obes Metab* 2016;**18**:537–541.
93. Pi-Sunyer X, Astrup A, Fujioka K, Greenway F, Halpern A, Krempf M, Lau DC, Le Roux CW, Violante Ortiz R, Jensen CB, Wilding JP, Obesity S, Prediabetes NN8022-1839 Study Group. A randomized, controlled trial of 3.0 mg of liraglutide in weight management. *N Engl J Med* 2015;**373**:11–22.
94. Plutzky J, Garber A, Falahati A, Toft AD, Poulter NR. Reductions in lipids and CV risk markers in patients with type 2 diabetes treated with liraglutide: a meta-analysis. *Can J Diabetes* 2009;**33**:209–210.
95. Zinman B, Gerich J, Buse JB, Lewin A, Schwartz S, Raskin P, Hale PM, Zdravkovic M, Blonde L; LEAD-4 Study Investigators. Efficacy and safety of the human glucagon-like peptide-1 analog liraglutide in combination with metformin and thiazolidinedione in patients with type 2 diabetes (lead-4 met+tzd). *Diabetes Care* 2009;**32**:1224–1230.
96. Ceriello A, Novials A, Canivell S, La Sala L, Pujadas G, Esposito K, Testa R, Bucciarelli L, Rondinelli M, Genovese S. Simultaneous glp-1 and insulin administration acutely enhances their vasodilatory, antiinflammatory, and antioxidant action in type 2 diabetes. *Diabetes Care* 2014;**37**:1938–1943.
97. Drucker DJ, Rosen CF. Glucagon-like peptide-1 (glp-1) receptor agonists, obesity and psoriasis: diabetes meets dermatology. *Diabetologia* 2011;**54**:2741–2744.
98. Wang XHM, Weng SY, Kim YO, Steven S, Klein T, Daiber A, Schuppan D. Gliptins suppress inflammatory macrophage activation to mitigate inflammation, fibrosis, oxidative stress, and vascular dysfunction in models of nonalcoholic steatohepatitis and liver fibrosis. *Antioxid Redox Signal* 2017; doi: 10.1089/ars.2016.6953.
99. Leberherz CSG, Möllmann J, Kahles F, Schwarz M, Brüning J, Dimkovic N, Koch A, Trautwein C, Flöge J, Marx N, Tacke F, Lehrke M. Glp-1 levels predict mortality in patients with critical illness as well as end-stage renal disease. *Am J Med* 2017;**130**:833–841.
100. Krölller-Schön S, Knorr M, Hausding M, Oelze M, Schuff A, Schell R, Sudowe S, Scholz A, Daub S, Karbach S, Kossmann S, Gori T, Wenzel P, Schulz E, Grabbe S, Klein T, Münzel T, Daiber A. Glucose-independent improvement of vascular dysfunction in experimental sepsis by dipeptidyl-peptidase 4 inhibition. *Cardiovasc Res* 2012;**96**:140–149.
101. Lanborg J, Vejstrup N, Kelbæk H, Botker HE, Kim WY, Mathiasen AB, Jørgensen E, Helqvist S, Saunamäki K, Clemmensen P, Holmvang L, Thuesen L, Krusell LR, Jensen JS, Køber L, Treiman M, Holst JJ, Engström T. Exenatide reduces reperfusion injury in patients with st-segment elevation myocardial infarction. *Eur Heart J* 2012;**33**:1491–1499.
102. Woo JS, Kim W, Ha SJ, Kim JB, Kim SJ, Kim WS, Seon HJ, Kim KS. Cardioprotective effects of exenatide in patients with st-segment-elevation myocardial infarction undergoing primary percutaneous coronary intervention: results of exenatide myocardial protection in revascularization study. *Arterioscler Thromb Vasc Biol* 2013;**33**:2252–2260.
103. Chen WR, Hu SY, Chen YD, Zhang Y, Qian G, Wang J, Yang JJ, Wang ZF, Tian F, Ning QX. Effects of liraglutide on left ventricular function in patients with st-segment elevation myocardial infarction undergoing primary percutaneous coronary intervention. *Am Heart J* 2015;**170**:845–854.
104. Margulies KB, Hernandez AF, Redfield MM, Givertz MM, Oliveira GH, Cole R, Mann DL, Whellan DJ, Kiernan MS, Felker GM, McNulty SE, Anstrom KJ, Shah MR, Braunwald E, Cappola TP, Network NHFCR. Effects of liraglutide on clinical stability among patients with advanced heart failure and reduced ejection fraction: a randomized clinical trial. *JAMA* 2016;**316**:500–508.
105. Drucker DJ. The cardiovascular biology of glucagon-like peptide-1. *Cell Metab* 2016;**24**:15–30.
106. Steven S, Jurk K, Kopp M, Krölller-Schön S, Mikhed Y, Schwierczek K, Roohani S, Kashani F, Oelze M, Klein T, Tokalov S, Danckwardt S, Strand S, Wenzel P, Münzel T, Daiber A. Glucagon-like peptide-1 receptor signalling reduces microvascular thrombosis, nitro-oxidative stress and platelet activation in endotoxaemic mice. *Br J Pharmacol* 2017;**174**:1620–1632.
